# Supplementary material for: Purple tea: chemical characterization and evaluation as inhibitor of pancreatic lipase and fat digestion in mice
Source: Royal Society of Chemistry journal article supplement (doi:10.1039/d2fo02442j), 2023-01-01
Supplement: d2fo02442j1.pdf [file d2fo02442j1.pdf]

## Purple tea: chemical characterization, and evaluation as inhibitor of pancreatic lipase and fat digestion in mice

Tamires Barlati Vieira da Silva, Maria Inês Dias, Carla Pereira, Filipa Mandim, Marija Ivanov, Marina Soković, Isabel C.F.R. Ferreira, Lillian Barros, Flávio Augusto Vicente Seixas, Adelar Bracht, Rosane Marina Peralta

### Electronic supplementary information (ESI)

Table 1S. Antioxidant activities of green tea and purple tea

| Antioxidant evaluation                       | Green tea                  | Purple tea                 |
|----------------------------------------------|----------------------------|----------------------------|
| <b>Chemical-based antioxidant activities</b> |                            |                            |
| DPPH (IC <sub>50</sub> µg/mL)                | 10.5± 0.5 <sup>(a)</sup>   | 9.1± 0.4 <sup>(a)</sup>    |
| FRAP (µmol of Trolox equivalent/mg extract)  | 3822± 167 <sup>(a)</sup>   | 4178± 525 <sup>(a)</sup>   |
| ORAC (µmol of Trolox equivalent/mg extract)  | 3661 ± 1559 <sup>(a)</sup> | 5547 ± 428 <sup>(b)</sup>  |
| <b>Cell-based antioxidant activities</b>     |                            |                            |
| TBARS (IC <sub>50</sub> , ng/mL)             | 16.00±0.001 <sup>(a)</sup> | 18.00±0.001 <sup>(b)</sup> |
| OxHLIA (IC <sub>50</sub> , µg/mL, Δt=60 min) | 13±1 <sup>(a)</sup>        | 12.7±0.4 <sup>(b)</sup>    |

Different letters overwritten to the averages of the same line indicate a significant difference at the level of 5%. DPPH IC<sub>50</sub> Trolox= 110±12 µg/mL; OxHLIA, Δt=60 min IC<sub>50</sub> Trolox =21.80±0.20 µg/mL; TBARS IC<sub>50</sub>, Trolox= 5.8 ± 0.6 µg/mL.

**Table 2S.** Cytotoxic and anti-inflammatory activities of green tea and purple tea

| <b>Bioactivities</b>                               | <b>Tea extracts</b>  |                      | <b>Positive control</b> |
|----------------------------------------------------|----------------------|----------------------|-------------------------|
| <b>Cytotoxic activity (GI<sub>50</sub>, µg/mL)</b> | <b>Green</b>         | <b>Purple</b>        | <b>ellipticine</b>      |
| NCI H460 (non-small cell lung carcinoma)           | 59±4 <sup>(a)</sup>  | 58±3 <sup>(a)</sup>  | 1.03±0.09               |
| HepG2 (cervical carcinoma)                         | 20±2 <sup>(a)</sup>  | 21±2 <sup>(a)</sup>  | 1.1±0.2                 |
| MCF7 (hepatocellular carcinoma)                    | 68 ±5 <sup>(a)</sup> | 74±3 <sup>(b)</sup>  | 1.1±0.2                 |
| HeLa (breast carcinoma)                            | 64±3 <sup>(a)</sup>  | 71±4 <sup>(b)</sup>  | 1.91±0.06               |
| PLP2 (porcine liver primary cells)                 | 120±8 <sup>(a)</sup> | 121±3 <sup>(a)</sup> | 3.2±0.7                 |

  

| <b>Anti-inflammatory activity (IC<sub>50</sub>, µg/mL)</b> | <b>Green</b>        | <b>Purple</b>       | <b>Dexamethasone</b> |
|------------------------------------------------------------|---------------------|---------------------|----------------------|
| RAW264.7                                                   | 82±4 <sup>(a)</sup> | 76±5 <sup>(a)</sup> | 6±1                  |

Different letters overwritten to the averages of the same line indicate a significant difference at the level of 5%.

## Data sets

1) Data set used to construct the graph of panel A in Figure 2: concentration dependences ( $C$ , given as  $\mu\text{mL}$ ) of the actions of purple and green tea extracts on the activity of the pancreatic lipase ( $v$ ), expressed as fraction of the control (no extract added).

| C   | Purple tea without preincubation |       |       |       | Purple tea after preincubation |       |       |       |
|-----|----------------------------------|-------|-------|-------|--------------------------------|-------|-------|-------|
| 50  | 0.90                             | 0.90  | 0.95  | 0.90  | 0.79                           | 0.81  | 0.79  | 0.769 |
| 100 | 0.95                             | 0.95  | 0.90  | 0.90  | 0.468                          | 0.467 | 0.424 | 0.464 |
| 150 | 0.70                             | 0.71  | 0.70  | 0.749 | 0.308                          | 0.32  | 0.381 | 0.38  |
| 200 | 0.551                            | 0.561 | 0.551 | 0.561 | 0.247                          | 0.211 | 0.214 | 0.233 |
| 250 | 0.362                            | 0.463 | 0.424 | 0.41  | 0.215                          | 0.216 | 0.114 | 0.121 |
| 300 | 0.347                            | 0.375 | 0.335 | 0.337 | 0.056                          | 0.8   | 0.06  | 0.115 |
| 400 | 0.197                            | 0.22  | 0.138 | 0.221 | 0.02                           | 0.05  | 0.04  | 0.07  |

| C   | Green tea without preincubation |      |      |      | Green tea after preincubation |      |      |      |
|-----|---------------------------------|------|------|------|-------------------------------|------|------|------|
| 50  | 1.00                            | 1.00 | 0.97 | 0.99 | 0.95                          | 0.97 | 0.92 | 0.95 |
| 100 | 0.95                            | 0.90 | 1.00 | 0.90 | 0.95                          | 0.90 | 0.90 | 0.95 |
| 150 | 0.92                            | 0.92 | 0.95 | 0.90 | 0.90                          | 0.93 | 0.91 | 0.92 |
| 200 | 0.92                            | 0.90 | 0.87 | 0.87 | 0.86                          | 0.88 | 0.86 | 0.90 |
| 250 | 0.90                            | 0.95 | 0.85 | 0.91 | 0.76                          | 0.78 | 0.76 | 0.81 |
| 300 | 0.83                            | 0.83 | 0.81 | 0.85 | 0.70                          | 0.72 | 0.72 | 0.70 |
| 400 | 0.80                            | 0.76 | 0.81 | 0.77 | 0.60                          | 0.58 | 0.61 | 0.54 |

2) Data set of the kinetics of the inhibition of the pancreatic lipase by the purple tea extract (Figure 2, panel B).  $v$  = reaction rate ( $\mu\text{mol}/\text{min}$ );  $S$  = substrate concentration (p-nitrophenyl-palmitate;  $\mu\text{M}$ )

| S (μM) | No addition |       | Purple tea extract<br>(50 μg/mL) |       | Purple tea extract<br>(200 μg/mL) |       |
|--------|-------------|-------|----------------------------------|-------|-----------------------------------|-------|
|        | 20          | 0.400 | 0.379                            | 0.289 | 0.290                             | 0.008 |
| 40     | 0.672       | 0.665 | 0.526                            | 0.550 | 0.034                             | 0.063 |
| 60     | 0.827       | 0.897 | 0.701                            | 0.720 | 0.097                             | 0.093 |
| 80     | 0.951       | 0.980 | 0.762                            | 0.781 | 0.202                             | 0.200 |
| 100    | 1.011       | 1.028 | 0.716                            | 0.725 | 0.267                             | 0.240 |
| 160    | 1.019       | 1.042 | 0.887                            | 0.874 | 0.400                             | 0.410 |
| 200    | 1.011       | 1.017 | 0.831                            | 0.901 | 0.414                             | 0.412 |
| 300    | 1.060       | 1.016 | 0.921                            | 0.863 | 0.391                             | 0.366 |

3) Data set of the time course of plasma triglycerate concentrations after an olive oil load under various conditions (triglyceride tolerance tests; Figure 3).

3a) Actions of the purple tea extract and orlistat (mean value at time zero:  $186.5 \pm 15.7$  mg/dL)

| Time (min) | Control |     |     | After orlistat administration (50 mg/kg) |     |     |
|------------|---------|-----|-----|------------------------------------------|-----|-----|
|            | 90      | 490 | 267 | 385                                      | 203 | 244 |
| 180        | 521     | 494 | 577 | 191                                      | 132 | 200 |
| 270        | 481     | 563 | 337 | 146                                      | 130 | 156 |
| 360        | 357     | 375 | 173 | 270                                      | 236 | 124 |

| Time (min) | After purple tea extract administration<br>(100 mg/kg) |     |     | After purple tea extract administration<br>(250 mg/kg) |     |     |
|------------|--------------------------------------------------------|-----|-----|--------------------------------------------------------|-----|-----|
|            | 90                                                     | 297 | 332 | 404                                                    | 241 | 263 |
| 180        | 455                                                    | 470 | 417 | 288                                                    | 291 | 284 |
| 270        | 412                                                    | 431 | 387 | 297                                                    | 216 | 222 |
| 360        | 207                                                    | 250 | 241 | 209                                                    | 149 | 187 |
| Time (min) | After purple tea extract administration<br>(100 mg/kg) |     |     |                                                        |     |     |
|            | 90                                                     | 182 | 193 | 233                                                    |     |     |
|            | 180                                                    | 131 | 173 | 204                                                    |     |     |
|            | 270                                                    | 122 | 167 | 172                                                    |     |     |
|            | 360                                                    | 121 | 153 | 162                                                    |     |     |

3b) Actions of the green tea extract and orlistat (mean value at time zero:  $176.6 \pm 24.5$  mg/dL)

| Time (min) | After green tea extract administration<br>(100 mg/kg) |     |     |
|------------|-------------------------------------------------------|-----|-----|
| 90         | 447                                                   | 556 | 451 |
| 180        | 567                                                   | 456 | 363 |
| 270        | 239                                                   | 412 | 393 |
| 360        | 221                                                   | 341 | 283 |
